# Supplementary material
Source: HighWire-hosted journal article supplement (http://www.qdcxjkg.com/highwire/filestream/113955/field_highwire_adjunct_files/0/BOLD_22b_erj_suppl_rev2.pdf)
Supplement: BOLD_22b_erj_suppl_rev2.pdf [file BOLD_22b_erj_suppl_rev2.pdf]

**Online supplement to**

**”Predictors of dyspnea prevalence: Results from the BOLD study”**

Authors for the BOLD collaboration:

Rune Nielsen, Institute of Medicine, University of Bergen, Norway and Department of Thoracic Medicine, Haukeland University Hospital, Bergen, Norway

William M. Vollmer, Kaiser Permanente Center for Health Research, Portland, Oregon, USA

Jon A. Hardie, Institute of Medicine, University of Bergen, Norway and Department of Thoracic Medicine, Haukeland University Hospital, Bergen, Norway

Inga Sif Ólafsdóttir, Respiratory Medicine & Allergology, Dept. of Medicinal Sciences, Uppsala University, University Hospital, SE 751 85 Uppsala, Sweden

Bernd Lamprecht, Department of Pulmonary Medicine, Paracelsus Medical University, Salzburg, Austria

A. Sonia Buist, Oregon Health and Sciences University, Portland Oregon, USA

Louisa Gnatiuc, Respiratory Epidemiology and Public Health, Imperial College, London, UK

Amund Gulsvik, Institute of Medicine, University of Bergen, Norway and Department of Thoracic Medicine, Haukeland University Hospital, Bergen, Norway

Ane Johannessen Centre for clinical research, Haukeland University Hospital, Bergen, Norway

Paul Enright, University of Arizona, Tucson, Arizona, USA

Corresponding author:

Rune Nielsen, [nielsenrune@me.com](mailto:nielsenrune@me.com)

Phone: +47 55 97 32 45

Postal address:       Lungeavdelingen  
                              Haukeland Universitetssykehus  
                              N-5021 Bergen  
                              Norway

**E-table 1: Sampling strategy and response rates for 15 BOLD sites included in the current analyses**

| Country      | Site      | Sample                | Respondents* | Response rate# | Satisfactory post-BD spirometry | Inability to walk <sup>+</sup> | Available for dyspnea analyses |
|--------------|-----------|-----------------------|--------------|----------------|---------------------------------|--------------------------------|--------------------------------|
| China        | Guangzhou | Stratified random     | 602          | 87%            | 473                             | 12                             | 461                            |
| India        | Mumbai    | Stratified cluster    | 465          | 25%            | 440                             | 6                              | 434                            |
| Sweden       | Uppsala   | Stratified random     | 588          | 61%            | 547                             | 58                             | 489                            |
| Austria      | Salzburg  | Stratified random     | 1349         | 65%            | 1258                            | 56                             | 1202                           |
| Norway       | Bergen    | Stratified random     | 707          | 68%            | 658                             | 83                             | 575                            |
| Iceland      | Reykjavik | Simple random         | 758          | 81%            | 757                             | 30                             | 727                            |
| Canada       | Vancouver | Random digit dialling | 856          | 26%            | 827                             | 34                             | 793                            |
| UK           | London    | Stratified random     | 697          | 17%            | 677                             | 30                             | 647                            |
| Germany      | Hanover   | Stratified random     | 713          | 59%            | 683                             | 154                            | 457                            |
| Australia    | Sydney    | Stratified random     | 585          | 25%            | 541                             | 44                             | 497                            |
| Poland       | Krakow    | Stratified random     | 603          | 78%            | 526                             | 45                             | 481                            |
| Philippines  | Manila    | Cluster               | 918          | 58%            | 893                             | 68                             | 825                            |
| South Africa | Cape Town | Cluster               | 896          | 63%            | 847                             | 76                             | 771                            |
| Turkey       | Adana     | Stratified cluster    | 875          | 82%            | 806                             | 166                            | 640                            |
| USA          | Lexington | Random digit dialling | 563          | 14%            | 508                             | 92                             | 416                            |

BD – bronchodilator

\* participants with questionnaire data and at least one post-BD spirometry

# response rate as a fraction of eligible subjects (excluding subjects with identified reasons for ineligibility)

+ inability to walk due to other reasons than dyspnea

E-table 2: Prevalence and 95% confidence intervals of mMRC defined dyspnea in 15 sites of the BOLD study.

|        | Turkey           | USA              | South-Africa     | Phillipines      | Poland          | Australia        | UK               | Canada           | Iceland          | Austria          | Germany        | Norway         | Sweden         | India         | China          |
|--------|------------------|------------------|------------------|------------------|-----------------|------------------|------------------|------------------|------------------|------------------|----------------|----------------|----------------|---------------|----------------|
| mMRC 1 | 25.3 (22.0-28.9) | 27.9 (23.7-32.5) | 13.1 (10.8-15.7) | 19.4 (16.8-22.3) | 12.3 (9.5-15.6) | 20.3 (16.9-24.3) | 13.3 (10.8-16.2) | 17.2 (14.6-20.0) | 14.2 (11.8-17.0) | 11.7 (10.0-13.7) | 9.6 (7.3-12.6) | 8.2 (6.1-10.8) | 7.4 (5.2-10.1) | 2.3 (1.2-4.3) | 3.0 (1.7-5.2)  |
| mMRC 2 | 16.7 (14.0-19.9) | 6.7 (4.6-9.7)    | 11.3 (9.2-13.8)  | 9.7 (7.8-12.0)   | 11.6 (9.0-14.9) | 3.8 (2.4-6.0)    | 7.3 (5.4-9.6)    | 4.3 (3.0-6.0)    | 5.8 (4.2-7.8)    | 5.6 (4.4-7.1)    | 3.0 (1.9-5.0)  | 4.3 (2.9-6.4)  | 3.9 (2.4-6.1)  | 2.5 (1.3-4.6) | 3.9 (2.4-6.2)  |
| mMRC 3 | 3.9 (2.6-5.8)    | 10.3 (7.7-13.8)  | 9.1 (7.2-11.4)   | 11.5 (9.5-13.9)  | 4.6 (3.0-7.0)   | 2.2 (1.2-4.0)    | 2.2 (1.2-3.7)    | 1.8 (1.0-3.0)    | 1.7 (0.9-3.0)    | 0.7 (0.4-1.5)    | 0.8 (0.2-2.1)* | 1.0 (0.4-2.4)  | 0.2 (0.0-1.3)* | 4.4 (2.7-6.9) | 0.9 (0.3-2.4)* |
| mMRC 4 | 2.7 (1.6-4.3)    | 2.9 (1.6-5.1)    | 8.9 (7.1-11.2)   | 0.7 (0.3-1.7)    | 7.5 (5.4-10.3)  | 1.0 (0.4-2.5)    | 2.6 (1.6-4.3)    | 0.9 (0.4-1.9)    | 1.0 (0.4-2.1)    | 0.2 (0.1-0.8)*   | 0.2 (0.0-1.2)* | 0*             | 1.0 (0.4-2.5)  | 3.0 (1.7-5.2) | 0.2 (0.0-1.4)* |

\* n < 5

E-table 3: Point estimates (SD) and prevalence of risk factors included in the multivariate analyses on mMRC defined dyspnea in 15 sites of the BOLD study.

|                                                     | Australia   | Austria     | Canada       | China       | Germany     | Iceland     | India       | USA         | Norway      | Philippines | Poland      | South-Africa | Sweden      | Turkey      | UK          |
|-----------------------------------------------------|-------------|-------------|--------------|-------------|-------------|-------------|-------------|-------------|-------------|-------------|-------------|--------------|-------------|-------------|-------------|
| Male sex, %                                         | 49.0        | 54.5        | 41.6         | 49.9        | 51.1        | 53.2        | 62.5        | 40.6        | 49.2        | 42.3        | 50.6        | 37.2         | 51.7        | 48.3        | 47.7        |
| Age, mean (SD)                                      | 58.9 (12.4) | 57.7 (11.4) | 56.0 (11.8)  | 54.1 (10.7) | 58.1 (11.0) | 56.4 (11.7) | 51.1 (8.9)  | 56.6 (9.9)  | 59.8 (12.6) | 52.3 (10.2) | 55.7 (11.5) | 54.2 (10.5)  | 58.4 (10.9) | 53.6 (10.4) | 58.2 (11.5) |
| FVC % pred, mean (SD)                               | 96.2 (15.5) | 98.8 (15.3) | 101.1 (16.0) | 86.1 (13.3) | 98.4 (14.2) | 94.2 (13.3) | 74.9 (12.4) | 87.8 (14.7) | 97.3 (14.1) | 76.4 (12.6) | 81.6 (15.2) | 96.4 (13.8)  | 96.4 (13.8) | 94.9 (15.4) | 93.5 (15.3) |
| FEV1/FVC < LLN, %                                   | 10.9        | 15.8        | 12.3         | 7.8         | 8.9         | 11.0        | 6.8         | 15.2        | 12.5        | 8.5         | 13.7        | 19.0         | 9.3         | 14.3        | 16.0        |
| BMI $\geq$ 30 kg/m <sup>2</sup> , %                 | 24.4        | 17.5        | 21.6         | 3.4         | 22.4        | 28.0        | 7.5         | 46.9        | 18.2        | 12.9        | 28.0        | 35.8         | 21.6        | 44.9        | 23.6        |
| BMI < 18.5 kg/m <sup>2</sup> , %                    | 0.4         | 1.0         | 0.9          | 5.3         | 0.7         | 0.4         | 8.0         | 0.2         | 0.9         | 6.7         | 0.8         | 7.4          | 0           | 0.6         | 0.7         |
| Current smoker, %                                   | 14.1        | 19.2        | 13.8         | 29.8        | 20.6        | 18.4        | 6.6         | 26.4        | 25.1        | 32.7        | 29.1        | 46.4         | 14.3        | 34.9        | 21.0        |
| Ex-smoker, %                                        | 36.8        | 33.5        | 38.5         | 14.0        | 39.2        | 42.7        | 3.2         | 33.9        | 36.6        | 20.2        | 32.3        | 21.4         | 43.1        | 19.9        | 40.9        |
| Never-smoker, %                                     | 49.2        | 47.3        | 47.8         | 56.2        | 40.1        | 39.0        | 90.2        | 39.8        | 37.2        | 47.1        | 38.6        | 32.2         | 42.6        | 45.3        | 38.1        |
| Primary school, %                                   | 3.3         | 10.9        | 1.9          | 22.6        | 0.6         | 8.2         | 9.8         | 2.4         | 7.5         | 5.3         | 35.7        | 40.3         | 12.8        | 41.7        | 4.6         |
| Middle school, %                                    | 23.8        | 6.4         | 5.1          | 26.2        | 9.4         | 16.3        | 12.7        | 15.0        | 11.6        | 31.8        | 3.4         | 31.2         | 11.3        | 7.2         | 2.4         |
| High school                                         | 11.8        | 58.1        | 16.6         | 32.4        | 59.0        | 12.0        | 37.1        | 34.5        | 44.1        | 35.1        | 44.9        | 16.7         | 26.1        | 10.6        | 37.2        |
| Some college, %                                     | 34.8        | 9.7         | 26.6         | 5.9         | 6.3         | 34.5        | 13.0        | 26.6        | 17.8        | 8.5         | 6.3         | 3.9          | 22.1        | 1.2         | 24.1        |
| $\geq$ 4 year college, %                            | 26.1        | 14.9        | 49.5         | 6.3         | 23.7        | 28.5        | 16.1        | 21.3        | 19.2        | 14.3        | 7.4         | 3.0          | 27.4        | 2.2         | 30.7        |
| No education, %                                     | 0.2         | 0.1         | 0.2          | 6.6         | 0.9         | 0.4         | 11.4        | 0.2         | 0           | 4.9         | 2.3         | 3.8          | 0.2         | 37.1        | 0.6         |
| Dust exposure at work, %                            | 32.0        | 27.5        | 30.2         | 38.1        | 24.5        | 31.8        | 6.1         | 48.2        | 40.0        | 53.5        | 50.0        | 46.6         | 32.0        | 50.1        | 24.2        |
| Heart disease, %                                    | 12.2        | 11.5        | 11.1         | 9.7         | 15.7        | 13.9        | 1.6         | 27.4        | 12.6        | 9.1         | 31.9        | 9.2          | 10.2        | 9.7         | 5.6         |
| Hypertension, %                                     | 31.8        | 28.9        | 20.3         | 17.8        | 38.4        | 32.0        | 10.0        | 49.2        | 29.5        | 26.5        | 42.0        | 39.0         | 28.7        | 27.1        | 33.1        |
| Diabetes, %                                         | 9.2         | 6.4         | 7.0          | 4.0         | 6.3         | 4.8         | 5.2         | 17.3        | 5.9         | 5.9         | 11.2        | 13.1         | 3.8         | 10.3        | 6.8         |
| Tuberculosis, %                                     | 0.7         | 2.7         | 3.1          | 3.6         | 3.7         | 4.8         | 0.9         | 1.8         | 0.3         | 7.5         | 2.7         | 15.1         | 1.1         | 2.5         | 2.5         |
| Removed lung, %                                     | 0.7         | 0.4         | 1.5          | 0.9         | 0.7         | 0.8         | 0           | 0.8         | 0.3         | 0           | 0.2         | 0.4          | 0           | 0.1         | 0.4         |
| Childhood hospitalization for breathing problems, % | 5.6         | 3.2         | 8.6          | 1.9         | 3.4         | 1.9         | 0           | 5.5         | 3.0         | 1.2         | 3.6         | 3.7          | 4.2         | 0.4         | 3.7         |

## BOLD mMRC questionnaires:

### Australian, England & USA

#### Breathlessness

10. Are you unable to walk due to a condition other than shortness of breath? Yes   
No

*[If yes to Question 10, please describe this condition on the line below and then skip to Question 12. If no or unsure, go directly to Question 11.]*

Nature of condition(s): \_\_\_\_\_

11. Are you troubled by shortness of breath when hurrying on the level or walking up a slight hill? Yes   
No

*[If yes, ask Question 11A through 11D; If no, skip to Question 12]*

- 11A. Do you have to walk slower than people of your age on level ground because of shortness of breath? Yes   
No   
Does not apply

- 11B. Do you ever have to stop for breath when walking at your own pace on level ground? Yes   
No   
Does not apply

- 11C. Do you ever have to stop for breath after walking about 100 yards (or after a few minutes) on level ground? Yes   
No   
Does not apply

- 11D. Are you too short of breath to leave the house or short of breath on dressing or undressing? Yes   
No   
Does not apply

**Canada**

**Essoufflement**

10. Êtes-vous incapable de marcher à cause d'une condition autre que l'essoufflement? **Oui**   
**Non**

*[si **Oui** à la Question 10, veuillez décrire cette condition à la ligne ci-dessous et sautez ensuite à la question 12. Si **Non**, sautez directement à la question 11.]*

Nature de la condition: \_\_\_\_\_

11. Devenez-vous essoufflé quand vous vous dépêchez sur un terrain plat ou quand vous montez une pente légère? **Oui**   
**Non**

*[Si **Oui**, posez les questions 11A à 11D; si **Non**, sautez à la question 12]*

- 11A. Devez-vous marcher plus lentement que les gens de votre âge sur un terrain plat parce que vous devenez essoufflé? **Oui**   
**Non**   
Sans objet

- 11B. Vous arrive-t-il de vous arrêter pour reprendre votre souffle quand vous marchez à votre rythme sur un terrain plat? **Oui**   
**Non**   
Sans objet

- 11C. Vous arrive-t-il de vous arrêter pour reprendre votre souffle après avoir marché environ 100 mètres (ou après quelques minutes) sur un terrain plat? **Oui**   
**Non**   
Sans objet

- 11D. Êtes-vous trop essoufflé pour quitter la maison ou devenez-vous essoufflé en vous habillant ou en vous déshabillant? **Oui**   
**Non**   
Sans objet

## Austria&Germany

### Atemnot

10. Gibt es einen anderen Grund als Kurzatmigkeit, der Sie am Gehen hindert? Ja   
Nein

*[Falls "ja", bitte beschreiben Sie den Zustand in der unten folgenden Zeile und setzen Sie dann fort mit Frage 12. Falls "nein", bitte weiter mit Frage 11.]*

Art des Zustandes: \_\_\_\_\_

11. Werden Sie durch Kurzatmigkeit behindert, wenn Sie in der Ebene schnell gehen oder eine leichte Ansteigung hinauf spazieren. Ja   
Nein

*[Falls "ja", stellen Sie die Fragen 11A bis 11D; falls "nein", weiter mit Frage 12]*

- 11A. Müssen Sie in der Ebene auf Grund von Kurzatmigkeit langsamer gehen als Leute Ihres Alters? Ja   
Nein   
Trifft nicht zu

- 11B. Müssen sie einmal wegen Atemnot anhalten, wenn Sie in Ihrem eigenen Tempo auf einer ebenen Strecke gehen? Ja   
Nein   
Trifft nicht zu

- 11C. Müssen Sie einmal wegen Atemnot anhalten, nachdem Sie ca. 100 Meter (oder nach wenigen Minuten) auf einer ebenen Strecke gegangen sind? Ja   
Nein   
Trifft nicht zu

- 11D. Können Sie wegen Atemnot Ihr Haus nicht verlassen oder sich auf Grund von Atemnot nicht an- oder ausziehen? Ja   
Nein   
Trifft nicht zu

## S Africa, Afrikaans

### Kortasemheid

10. Ly u aan 'n toestand anders as kortasemheid wat maak dat u nie kan loop nie? Ja   
Nee

[Indien **ja**, beskryf die toestand asseblief in die ruimte hieronder en spring dan na vraag 12. Indien **nee**, gaan direk aan met vraag 11.]

Aard van die toestand(e): \_\_\_\_\_

11. Het u las van kortasemheid wanneer u vinnig loop op 'n gelykte, of teen 'n effense heuwel uitloop? Ja   
Nee

( 'n gelykte beteken 'n plat oppervlak)

[Indien **ja**, vra vraag 11A tot 11D; indien **nee**, spring na vraag 12]

- 11A. Moet u op 'n gelykte stadiger loop as ander mense van u ouderdom omdat u kortasem raak? Ja   
Nee   
( 'n gelykte beteken 'n plat oppervlak) Nie van toepassing

- 11B. Is dit ooit vir u nodig om eers te gaan staan om u asem terug te kry wanneer u teen u eie pas op 'n gelykte loop? Ja   
Nee   
( 'n gelykte beteken 'n plat oppervlak) Nie van toepassing

- 11C. Moet u ooit eers gaan staan om u asem terug te kry nadat u op 'n gelykte sowat 100 meter geloop het (of na 'n paar minute)? Ja   
Nee   
Nie van toepassing

- 11D. Is u te kortasem om uit die huis uit te gaan of uitasem nadat u aan- of uitgetrek het? Ja   
Nee   
Nie van toepassing

### Iceland

#### Mæði

10. Ert þú ófær um gang af öðrum orsökum en mæði ? Já



Nei

[Ef **ja** við 10. spurningu, lýsið orsökinni í næstu línu og spyrjið 12. spurningar næst. Ef **nei** er 11.spurning næst]

Orsök:

11. Er mæði þér til trafala ef þú ert að flýta þér á jafnsléttu eða ganga upp smábrekku? Já   
Nei

[Ef **ja**, spyrjið spurninga 11A til 11D; Ef **nei**, er 12. spurning næst]

11A. Þarft þú að ganga hægar á jafnsléttu en jafnaldrar þínir vegna mæði? Já   
Nei

11B. Kemur fyrir að þú þurfir að stoppa til að ná andanum þegar þú gengur á jafnsléttu á venjulegum hraða? Já   
Nei

11C. Kemur fyrir að þú þurftir að stoppa til að ná andanum eftir um 100 m (eða fárra mínútna) gang á jafnsléttu? Já   
Nei

11D. Ert þú of mæðin/n til að fara úr húsi eða finnur þú fyrir við að mæði við að háttá þig eða klæða? Já   
Nei

Á ekki við

Norway

Tung pust

10. Er du forhindret fra å gå grunnet annen tilstand enn at du er kortpustet? Ja   
Nei

[Hvis **ja** på Spørsmål 10, vennligst beskriv din tilstand på linjen under og hopp så til Spørsmål 12. Hvis **nei**, gå direkte til Spørsmål 11.]

Hvilke tilstand(er): \_\_\_\_\_

11. Blir du tungpustet når du går fort på flat mark eller opp en slakk bakke? Ja   
Nei

*[Hvis ja, still Spørsmål 11A til 11D; Hvis nei, hopp til Spørsmål 12]*

- 11A. Må du gå saktere enn andre på din alder på flat mark på grunn av kort pust? Ja   
Nei   
Ikke aktuelt

- 11B. Må du noen gang stoppe for å få igjen pusten når du går i eget tempo på flat mark? Ja   
Nei   
Ikke aktuelt

- 11C. Må du noen gang stoppe for å få igjen pusten etter å ha gått cirka 100 meter (eller få minutter) på flat mark? Ja   
Nei   
Ikke aktuelt

- 11D. Er du for andpusten til å gå ut av huset, eller er du andpusten etter å ha kledd på eller av deg? Ja   
Nei   
Ikke aktuelt

## **Turkey**

### **Nefes Darlığı**

10. Bir kalp ya da akciğer hastalığı dışında yürümenizi engelleyen başka bir durumunuz var mı ? Evet  1  
Hayır  2

*Eğer 10. soruya verilen cevap **evet** ise, lütfen aşağıdaki satıra bu durumu yazın ve 12. soruya geçin. Eğer 10. soruya cevap **hayır** ise, 11. soruya geçin.*

Bu durumu(ları)belirtin:.....

.....

11. Düz yolda hızlı yürürken ya da hafif bir yokuş çıkarken soluğunuz daralıyor mu ? Evet  1  
Hayır  2

[Eğer cevap **evet** ise, soru 11A ile devam edin; cevap **hayır** ise soru 12'ye geçin.]

11A. Düz yolda yürürken nefes darlığı nedeniyle yaşitlarınıza göre daha yavaş yürümek zorunda kalıyor musunuz ? Evet  1  
Hayır  2

[Eğer cevap **evet** ise, soru 11B ile devam edin; cevap **hayır** ise soru 12'ye geçin.]

11B. Düz yolda kendi normal hızınızda yürürken hiç nefes almak için durmak zorunda kaldınız oluyor mu ? Evet  1  
Hayır  2

[Eğer cevap **evet** ise, soru 11C ile devam edin; cevap **hayır** ise soru 12'ye geçin.]

11C. Düz yolda yaklaşık 100 metre (ya da birkaç dakika) yürüdükten sonra hiç nefes almak için durmak zorunda kaldınız oluyor mu? Evet  1  
Hayır  2

[Eğer cevap **evet** ise, soru 11D ile devam edin; cevap **hayır** ise soru 12'ye geçin]

11D. Evden çıkamayacak kadar nefes darlığı çekiyor musunuz, ya da giyinirken veya soyunurken nefesiniz daralıyor mu? Evet  1  
Hayır  2

## **Poland**

### **Duszność**

10. Czy nie może Pan/i chodzić z przyczyn innych niż duszność? Tak   
Nie

[Jeśli TAK w odpowiedzi na pytanie 10, proszę opisać ten stan w linijce poniżej a następnie przejść do pytania 12; jeśli NIE, przejdź bezpośrednio do pytania 11.]

Rodzaj dolegliwości: \_\_\_\_\_

11. Czy duszność występuje u Pana/Pani podczas szybszego marszu po płaskim terenie lub wchodzenia na niewielką pochyłość?      Tak   
Nie

*[Jeśli TAK, zadaj pytania 11A do 11D; jeśli NIE, przejdź do pytania 12.]*

- 11A. Czy z powodu duszności jest Pan/i zmuszony/a do chodzenia po płaskim terenie wolniej niż inne osoby w Pani/a wieku?      Tak   
Nie   
Nie dotyczy

- 11B. Czy kiedykolwiek podczas marszu własnym tempem po płaskim terenie musi się Pan/i zatrzymać z powodu duszności?      Tak   
Nie   
Nie dotyczy

- 11C. Czy kiedykolwiek musi Pan/i zatrzymać się z powodu duszności po przejściu około 30 metrów (lub po kilku minutach) po płaskiej powierzchni?      Tak   
Nie   
Nie dotyczy

- 11D. Czy duszność kiedykolwiek uniemożliwia wyjście z domu albo występuje podczas ubierania lub rozbierania się?      Tak   
Nie   
Nie dotyczy

**Philippines**  
**Paghihinala**

10. Hindi ka ba makalakad dahil meron kang karamdaman      Oo       maliban sa kinakapos ng hininga?      Hindi

[Kung **Oo**, ilarawan ang karamdamang ito sa linya sa ibaba, pagkatapos ay sagutin ang Tanong 12. Kung **Hindi**, laktawan ito at sagutin ang 11]

Uri ng (mga) karamdaman: \_\_\_\_\_

11. Hinihinal ka ba kapag nagmamadali ka sa patag na daan Oo   
o naglalakad sa medyo pataas na daan? Hindi

[Kung **Oo**, itanong ang 11A hanggan 11D. Kung **Hindi**, laktawan ang mga ito at magpatuloy sa Tanong 12]

- 11A. Kinakailangan bang mas mabagal kang maglakad sa patag kesa Oo   
sa mga kasing edad mo dahil humihinal ka? Hindi   
Walang kinalaman

- 11B. Napapatigil ka ba kelan man para habulin and hininga mo, Oo   
sa karaniwang bilis ng lakad mo sa patag na lupa? Hindi   
Walang kinalaman

- 11C. Napapatigil ka ba kelan man para habulin and hininga mo, Oo   
pag nilakad mo ang 100 yarda (o pagkaraan ng ilan minuto) Hindi   
sa patag na lupa? Walang kinalaman

- 11D. Masyado ka bang kapos ng hininga para lumabas ng bahay Oo   
o kapos ng hininga sa pagbihis? Hindi   
Walang kinalaman

**China**  
**呼吸困难**

10、您有因为心肺疾病以外的情况致使您不能行走吗？

是1；否2

**【如果是，请在下面的空行内对该情况予以描述，然后转问12；如果否，继续问11】**

NOT CODED

11、当您在平地快步走或爬小坡时是否感到气短？ 是1；否2

**【如果是，继续问11A；如果否，转问12】**

11A、您在平地行走时是否因为气短而较同龄人走得慢？ 是1；否2

**【如果是，继续问11B；如果否，转问12】**

11B、当您按自己的步伐在平地行走时是否需要停下来休息？ 是1；否2

**【如果是，继续问11C；如果否，转问12】**

11C、您平地行走约100米或行走几分钟后需要停下来休息吗？ 是1；否2

**【如果是，继续问11D；如果否，转问12】**

11D、您有因为气短而不能出门或影响到您穿衣和脱衣吗？ 是1；否2

## India, Mumbai Hindi

१०. क्या आप सांस फूलने के अलावा किसी अन्य स्थिति के कारण चलने में असमर्थ रहे हैं ?

हां  १ २६  
नहीं  २

(अगर प्रश्न १० का उत्तर हां, है तो इस स्थिति का नीचे दिये लाइन में उल्लेख करें, फिर प्रश्न १२ पर जाएं, अगर नहीं तो सीधे प्रश्न ११ पर जाएं)

स्थिति/यों की प्रकृति

११. क्या समतल स्थान पर तेज चलते या हल्के पहाड़ी रास्ते पर चलते हुए आपकी सांस फूलती है ?

हां  १ २७  
नहीं  २

(अगर हां, प्रश्न ११अ से ११द तर पूछें, अगर नहीं तो प्रश्न १२ पर जाएं)

११अ. क्या सांस फूलने के कारण आप समतल जमीन पर अपनी उम्र के लोगों से धीरे चलते हैं ?

हां  १ २८  
नहीं  २  
लागू नहीं  ३

११ब. क्या कभी समतल जमीन पर अपनी रफ्तार से चलते हुए आपको सांस लेने के लिए रुकना पडा है.

हां  १ २९  
नहीं  २

११क. क्या समतल जमीन पर करीब १०० गज (या कुछ मिनट बाद) आपको सांस लेने के लिए आपको कभी रुकना पडा है.

हां  १ ३०  
नहीं  २  
लागू नहीं  ३

११ड. क्या साँस फुलने के वजह से आप घर से बाहर नहीं निकल पाते या कपडे. पहनते या उतारते समय भी साँस फूलता महसूस होता है ?

हां  १ ३१  
नहीं  २  
लागू नहीं  ३
